# Analyzing Three-Player Quantum Games in an EPR Type Setup

James M. Chappell<sup>1,2\*</sup>, Azhar Iqbal<sup>2</sup>, Derek Abbott<sup>2</sup>

<sup>1</sup> School of Chemistry and Physics, University of Adelaide, Adelaide, South Australia, Australia, <sup>2</sup> School of Electrical and Electronic Engineering, University of Adelaide, Adelaide, South Australia, Australia

## Abstract

We use the formalism of Clifford Geometric Algebra (GA) to develop an analysis of quantum versions of three-player non-cooperative games. The quantum games we explore are played in an Einstein-Podolsky-Rosen (EPR) type setting. In this setting, the players' strategy sets remain identical to the ones in the mixed-strategy version of the classical game that is obtained as a proper subset of the corresponding quantum game. Using GA we investigate the outcome of a realization of the game by players sharing GHZ state, W state, and a mixture of GHZ and W states. As a specific example, we study the game of three-player Prisoners' Dilemma.

**Citation:** Chappell JM, Iqbal A, Abbott D (2011) Analyzing Three-Player Quantum Games in an EPR Type Setup. PLoS ONE 6(7): e21623. doi:10.1371/journal.pone.0021623

**Editor:** Attila Szolnoki, Hungarian Academy of Sciences, Hungary

**Received:** April 13, 2011; **Accepted:** June 3, 2011; **Published:** July 27, 2011

**Copyright:** © 2011 Chappell et al. This is an open-access article distributed under the terms of the Creative Commons Attribution License, which permits unrestricted use, distribution, and reproduction in any medium, provided the original author and source are credited.

**Funding:** The authors have no support or funding to report.

**Competing Interests:** The authors have declared that no competing interests exist.

\* E-mail: james.m.chappell@adelaide.edu.au

## Introduction

The field of game theory [1,2] has a long history [3], but was first formalized in 1944 with the work of von Neumann and Morgenstern [4], aiming to develop rational analysis of situations that involve strategic interdependence.

Classical game theory has found increasing expression in the field of physics [3] and its extension to the quantum regime [5] was proposed by Meyer [6] and Eisert et al [7], though its origins can be traced to earlier works [8–11]. Early studies in the area of quantum games focused on the two-player two-strategy non-cooperative games, with the proposal for a quantum Prisoners' Dilemma (PD) being well known [7]. A natural further development of this work was its extension to multiplayer quantum games that was explored by Benjamin and Hayden [12]. Du et al. [13,14] explored the phase transitions in quantum games for the first time that are central in the present article.

The usual approach in three-player quantum games considers players sharing a three-qubit quantum state with each player accessing their respective qubit in order to perform local unitary transformation. Quantum games have been reported [15] in which players share Greenberger-Horne-Zeilinger (GHZ) states and the W states [5], while other works have, for instance, investigated the effects of noise [16,17] and the benefits of players forming coalitions [18,19].

A suggested approach [20–23] in constructing quantum games uses an Einstein-Podolsky-Rosen (EPR) type setting [24–31]. In this approach, quantum games are setup with an EPR type apparatus, with the players' strategies being local actions related to their qubit, consisting of a linear combination (with real coefficients) of (spin or polarization) measurements performed in two selected directions.

Note that in a standard arrangement for playing a mixed-strategy game, players are faced with the identical situation, in that

in each run, a player has to choose one out of two pure strategies. As the players' strategy sets remain classical, the EPR type setting avoids a well known criticism [32] of quantum games. This criticism refers to quantization procedures in which players are given access to extended strategy sets, relative to what they are allowed to have in the classical game. Quantum games constructed with an EPR type setting have been studied in situations involving two players [22] and also three players [23]. The applications of three-player quantum games include describing three-party situations, involving strategic interaction in quantum communication [33].

In recent works, the formalism of Clifford's geometric algebra (GA) [34–38] has been applied to the analysis of two-player quantum games with significant benefits [39,40], and so is also adopted here in the analysis of three-player quantum games. The use of GA is justified on the grounds that the Pauli spin algebra is a matrix representation of Clifford's geometric algebra in  $\mathcal{R}^3$ , and hence we are choosing to work directly with the underlying Clifford algebra. There are also several other documented benefits of GA such as:

- The unification of the dot and cross product into a single product, has the significant advantage of possessing an inverse. This results in increased mathematical compactness, thereby aiding physical intuition and insight [41].
- The use of the Pauli and Dirac matrices also unnecessarily introduces the imaginary scalars, in contrast to GA, which uses exclusively real elements [42]. This fact was also pointed out by Sommerfield in 1931, who commented that '*Dirac's use of matrices simply rediscovered Clifford algebra*' [43].
- In the density matrix formalism of quantum mechanics, the expectation for an operator  $Q$  is given by  $\text{Tr}(\rho Q) = \langle \psi | Q | \psi \rangle$ , from which we find the isomorphism to GA,  $\text{Tr}(\rho Q) \leftrightarrow \langle \rho Q \rangle_0$ , the subscript zero, indicating to take the scalar part of the algebraic product  $\rho Q$ , where  $\rho$  and  $Q$  are

now constructed from real Clifford elements. This leads to a uniquely compact expression for the overlap probability between two states in the  $N$ -particle case, given by Eq. (13), which allows straightforward calculations that normally require  $8 \times 8$  complex matrices representing operations on three qubits.

- d) Pauli wave functions are isomorphic to the quaternions, and hence represent rotations of particle states [44]. This fact paves the way to describe general unitary transformations on qubits, in a simplified algebraic form, as *rotors*. In regard to Hestenes' analysis of the Dirac equation using GA, Boudet [41] notes that, 'the use of the pure real formalism of Hestenes brings noticeable simplifications and above all the entire geometrical clarification of the theory of the electron.'
- e) Recent works [6,39,40] show that GA provides a better intuitive understanding of Meyer's quantum penny flip game [6], using operations in 3-space with *real coordinates*, permitting helpful visualizations in determining the quantum player's winning strategy. Also, Christian [45,46] has recently used GA to produce thought provoking investigations into some of the foundational questions in quantum mechanics.

Our quantum games use an EPR type setting and players have access to general pure quantum states. We determine constraints that ensure a faithful embedding of the mixed-strategy version of the original classical game within the corresponding quantum game. We find how a Pareto-optimal quantum outcome emerges in three-player quantum PD game at high entanglement. We also report phase transitions taking place with increasing entanglement when players share a mixture of GHZ and W type states in superposition.

In an earlier paper [23], two of the three authors contributed to developing an entirely probabilistic framework for the analysis of three-player quantum games that are also played using an EPR type setting, whereas the present paper, though using an EPR type setting, provides an analysis from the perspective of quantum mechanics, with the mathematical formalism of GA. The previous work analyzed quantum games from the non-factorizable property of a joint probability distribution relevant to a physical system that the players shared in order to implement the game. For the game of three-player Prisoners' Dilemma, our probabilistic analysis showed that non-factorizability of a joint probability distribution indeed can lead to a new equilibrium in the game. The three-player quantum Prisoners' Dilemma, in the present analysis, however, moves to the next step and explores the phase structure relating players' payoffs with shared entanglement and also the impact of players sharing GHZ and W states and their mixture. We believe that without using the powerful formalism of GA, a similar analysis will nearly be impossible to perform using an entirely probabilistic approach as developed in [22].

### EPR setting for playing quantum games

The EPR setting [20,22,23] two player quantum games involves a large number of runs when, in a run, two halves of an EPR pair originate from the same source and move in the opposite directions. Player Alice receives one half whereas player Bob receives the other half. To keep the non-cooperative feature of the game, it is assumed that players Alice and Bob are located at some distance from each other and are not unable to communicate between themselves. The players, however, can communicate about their actions, which they perform on their received halves, to a *referee* who organizes the game and ensures that the rules of the game are followed. The referee makes available two directions to each player. In a run, each player has to choose one of two

available directions. The referee rotates Stern-Gerlach type detectors [5] along the two chosen directions and performs quantum measurement. The outcome of the quantum measurement, on Alice's side, and on Bob's side of the Stern-Gerlach detectors, is either  $+1$  or  $-1$ . Runs are repeated as the players receive a large number of halves in pairs, when each pair comes from the same source and the measurement outcomes are recorded for all runs. A player's strategy, defined over a large number of runs, is a linear combination (with normalized and real coefficients) of the two directions along which the measurement is performed. The referee makes public the payoff relations at the start of the game and announces rewards to the players after the completion of runs. The payoff relations are constructed in view of a) the matrix of the game, b) the list of players' choices of directions over a large number of runs, and c) the list of measurement outcomes that the referee prepares using his/her Stern-Gerlach apparatus.

For a three-player quantum game, this setting is extended to consider three players Alice, Bob and Chris who are located at the three arms of an EPR system [5]. In the following they will be denoted by  $A$ ,  $B$  and  $C$ , respectively. As it is the case with two-player EPR setting, in a run of the experiment, each player chooses one out of two directions.

We have used the EPR setting in view of the well known Enk and Pike's criticism [32] of quantum games that are played using Eisert et al's setting [7]. Essentially this criticism attempts to equate a quantum game to a classical game in which the players are given access to an extended set of classical strategies. The present paper uses an EPR setting in which each player has two classical strategies consisting of the two choices he/she can make between two directions along which a quantum measurement can be performed. That is, the player's pure strategy, in a run, consists of choosing one direction out of the two. As the sets of strategies remain exactly identical in both the classical and the quantum forms of the game, it is difficult to construct an Enk and Pike type argument for a quantum game that is played with an EPR setting.

As Fig. 1 shows, we represent Alice's two directions as  $\kappa_1^1, \kappa_1^2$ . Similarly, Bob's directions are  $\kappa_2^1, \kappa_2^2$  and Chris' are  $\kappa_3^1, \kappa_3^2$ . The players measurement directions form a triplet out of eight possible cases  $(\kappa_1^1, \kappa_1^2, \kappa_1^3)$ ,  $(\kappa_1^1, \kappa_2^2, \kappa_1^3)$ ,  $(\kappa_2^1, \kappa_2^2, \kappa_1^3)$ ,  $(\kappa_2^1, \kappa_2^2, \kappa_1^3)$ ,  $(\kappa_1^1, \kappa_2^2, \kappa_2^3)$ ,  $(\kappa_1^1, \kappa_2^2, \kappa_2^3)$ ,  $(\kappa_2^1, \kappa_2^2, \kappa_2^3)$  and measurement is performed along the chosen directional triplet. The measurement outcome for each player along their chosen direction is  $+1$  or  $-1$ .

Over a large number of runs the players sequentially receive three-particle systems emitted from a source and a record is maintained of the players' choices of directions over all runs. One of the eight possible outcomes  $(+1, +1, +1)$ ,  $(+1, -1, +1)$ ,  $(-1, +1, +1)$ ,  $(-1, -1, +1)$ ,  $(+1, +1, -1)$ ,  $(+1, -1, -1)$ ,  $(-1, +1, -1)$ ,  $(-1, -1, -1)$  emerges out of the measurement in an individual run, with the first entry for Alice's outcome, the second entry for Bob's outcome and the third entry for Chris' outcome.

In the following we express the players' payoff relations in terms of the outcomes of these measurements. These payoffs depend on the triplets of the players' strategic choices made over a large number of runs and on the dichotomic outcomes of the measurements performed along those directions.

### Players' sharing a symmetric initial state

We consider the situation in which an initial quantum state of three qubits is shared among three players. To obtain a fair game, we assume this state is symmetric with regard to the interchange of the three players. The GHZ state is a natural candidate given by

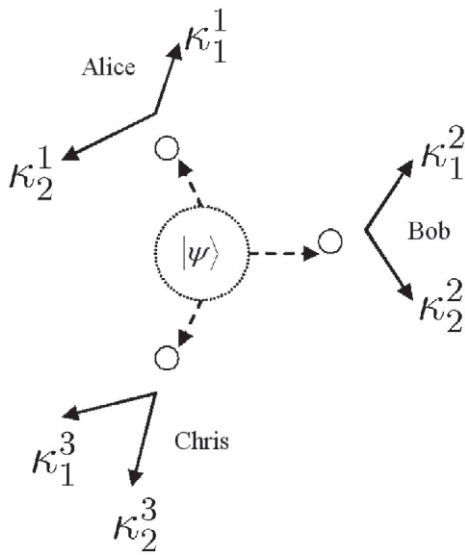

**Figure 1. The EPR setup for three-player quantum game.** A three-qubit entangled quantum state is distributed to the three players, who each choose between two possible measurement directions.  
doi:10.1371/journal.pone.0021623.g001

$$|\text{GHZ}\rangle = \cos \frac{\gamma}{2} |000\rangle + \sin \frac{\gamma}{2} |111\rangle, \quad (1)$$

where we have an entanglement angle  $\gamma \in \mathbb{R}$ , which has been shown [5] to be capable of producing the maximally entangled three qubit state. Alternatively we could start with the W entangled state

$$|\text{W}\rangle = \frac{1}{\sqrt{3}} (|100\rangle + |010\rangle + |001\rangle). \quad (2)$$

The other symmetric state would be an inverted W state

$$|\bar{\text{W}}\rangle = \frac{1}{\sqrt{3}} (|110\rangle + |011\rangle + |101\rangle). \quad (3)$$

After the measurement along three directions selected by the players, each player is rewarded according to a payoff matrix  $G^P$ , for each player  $P \in \{A, B, C\}$ . Thus the expected payoffs for a player is given by

$$\Pi_P(\kappa^1, \kappa^2, \kappa^3) = \sum_{i,j,k=0}^1 G_{ijk}^P P_{ijk}, \quad (4)$$

where  $P_{ijk}$  is the probability the state  $|i\rangle|j\rangle|k\rangle$  is obtained after measurement, with  $i, j, k \in \{0, 1\}$ , along the three directions  $\kappa^1, \kappa^2, \kappa^3$  chosen by Alice, Bob and Chris respectively. In the EPR setting,  $\kappa^1$  can be either of Alice's two directions i.e.  $\kappa_1^1$  or  $\kappa_2^1$  and similarly for Bob and Chris.

### Clifford's geometric algebra

The formalism of GA [34–38] has been shown to provide an equivalent description to the conventional tensor product formalism of quantum mechanics.

To set up the GA framework for representing quantum states, we begin by defining  $\sigma_1, \sigma_2, \sigma_3$  as a right-handed set of

orthonormal basis vectors, with

$$\sigma_i \cdot \sigma_j = \delta_{ij}, \quad (5)$$

where  $\delta_{ij}$  is Kronecker delta. Multiplication between algebraic elements is defined to be the geometric product, which for two vectors  $u$  and  $v$  is given by

$$uv = u \cdot v + u \wedge v, \quad (6)$$

where  $u \cdot v$  is the conventional symmetric dot product and  $u \wedge v$  is the anti-symmetric outer product related to the Gibbs cross product by  $u \times v = -u \wedge v$ , where  $\iota = \sigma_1 \sigma_2 \sigma_3$ . For distinct basis vectors we find

$$\sigma_i \sigma_j = \sigma_i \cdot \sigma_j + \sigma_i \wedge \sigma_j = \sigma_i \wedge \sigma_j = -\sigma_j \wedge \sigma_i = -\sigma_j \sigma_i. \quad (7)$$

This can be summarized by

$$\sigma_i \sigma_j = \delta_{ij} + \epsilon_{ijk} \sigma_k, \quad (8)$$

where  $\epsilon_{ijk}$  is the Levi-Civita symbol. We can therefore see that  $\iota$  squares to minus one, that is  $\iota^2 = \sigma_1 \sigma_2 \sigma_3 \sigma_1 \sigma_2 \sigma_3 = \sigma_1 \sigma_2 \sigma_1 \sigma_2 = -1$  and commutes with all other elements and so has identical properties to the unit imaginary  $i$ . Thus we have an isomorphism between the basis vectors  $\sigma_1, \sigma_2, \sigma_3$  and the Pauli matrices through the use of the geometric product.

In order to express quantum states in GA we use the one-to-one mapping [36,38] defined as follows

$$\begin{aligned} |\psi\rangle &= \alpha|0\rangle + \beta|1\rangle = \begin{bmatrix} a_0 + ia_3 \\ -a_2 + ia_1 \end{bmatrix} \leftrightarrow \psi \\ &= a_0 + a_1 \iota \sigma_1 + a_2 \iota \sigma_2 + a_3 \iota \sigma_3, \end{aligned} \quad (9)$$

where  $a_i$  are real scalars.

For a single particle we then have the basis vectors

$$|0\rangle \leftrightarrow 1, \quad |1\rangle \leftrightarrow -\iota \sigma_2 \quad (10)$$

and so for three particles we can use as a basis

$$|0\rangle|0\rangle|0\rangle \leftrightarrow 1 \quad (11a)$$

$$|0\rangle|0\rangle|1\rangle \leftrightarrow -\iota \sigma_2^3 \quad (11b)$$

$$|0\rangle|1\rangle|0\rangle \leftrightarrow -\iota \sigma_2^2 \quad (11c)$$

$$|0\rangle|1\rangle|1\rangle \leftrightarrow \iota \sigma_2^1 \sigma_2^3, \quad (11d)$$

$$|1\rangle|0\rangle|0\rangle \leftrightarrow -\iota \sigma_2^1 \quad (11e)$$

$$|1\rangle|0\rangle|1\rangle \leftrightarrow \iota \sigma_2^1 \sigma_2^3 \quad (11f)$$

$$|1\rangle|1\rangle|0\rangle \leftrightarrow i\sigma_2^1 \sigma_2^2 \quad (11g)$$

$$|1\rangle|1\rangle|1\rangle \leftrightarrow -i\sigma_2^1 \sigma_2^2 \sigma_2^3, \quad (11h)$$

where to reduce the number of superscripts representing particle number we write  $i\sigma_2^1$  as  $i\sigma_2^1$ . General unitary operations are equivalent to rotors in GA [36], represented as

$$R(\theta_1, \theta_2, \theta_3) = e^{-\theta_3 i\sigma_3/2} e^{-\theta_1 i\sigma_2/2} e^{-\theta_2 i\sigma_3/2}, \quad (12)$$

which is in Euler angle form and can completely explore the available space of a single qubit. Using the definition of unitary operations given by Eq. (12) we define  $A = R(\alpha_1, \alpha_2, \alpha_3)$ ,  $B = R(\beta_1, \beta_2, \beta_3)$ ,  $C = R(\chi_1, \chi_2, \chi_3)$  for general unitary transformations acting locally on each of the three players qubit in order to generalize the starting state, that is the GHZ or W states, as far as possible.

We define a separable state  $\phi = KLM$ , where  $K$ ,  $L$  and  $M$  are single particle rotors, which allow the players' measurement directions to be specified on the first, second and third qubit respectively. The state to be measured is now projected onto this separable state  $\phi$ . The overlap probability between two states  $\psi$  and  $\phi$  in the  $N$ -particle case is given in Ref. [36] as

$$P(\psi, \phi) = 2^{N-2} \left[ \langle \psi | E \psi^\dagger \phi E \phi^\dagger \rangle_0 - \langle \psi | J \psi^\dagger \phi J \phi^\dagger \rangle_0 \right], \quad (13)$$

where the angle brackets  $\langle \rangle_0$  mean to retain only the scalar part of the expression and  $E$  and  $J$  are defined for 3 particles in Ref. [36] as

$$E = \prod_{i=1}^N \frac{1}{2} (1 - i\sigma_3^i \sigma_3^i) = \frac{1}{4} (1 - i\sigma_3^1 \sigma_3^2 - i\sigma_3^1 \sigma_3^3 - i\sigma_3^2 \sigma_3^3) \quad (14a)$$

$$J = E i\sigma_3^1 = \frac{1}{4} (i\sigma_3^1 + i\sigma_3^2 + i\sigma_3^3 - i\sigma_3^1 \sigma_3^2 \sigma_3^3). \quad (14b)$$

The  $\dagger$  operator acts the same as complex conjugation: flipping the sign of  $i$  and inverting the order of the terms.

## Results

We now, firstly, calculate the observables from Eq. (11) for the GHZ state in GA, which from Eq. (11) gives

$$\psi = ABC \left( \cos \frac{\gamma}{2} - \sin \frac{\gamma}{2} i\sigma_2^1 \sigma_2^2 \sigma_2^3 \right), \quad (15)$$

where  $A$ ,  $B$ , and  $C$  represent the referee's local unitary actions, written as rotors  $A$ ,  $B$ , and  $C$  in GA, on the respective player's qubits, in order to generalize the starting state. Referring to Eq. (13), we firstly calculate

$$\begin{aligned} \psi J \psi^\dagger &= \frac{1}{4} ABC \left( \cos \frac{\gamma}{2} - \sin \frac{\gamma}{2} i\sigma_2^1 \sigma_2^2 \sigma_2^3 \right) (i\sigma_3^1 + i\sigma_3^2 + i\sigma_3^3 - i\sigma_3^1 \sigma_3^2 \sigma_3^3) \\ &\times \left( \cos \frac{\gamma}{2} + \sin \frac{\gamma}{2} i\sigma_2^1 \sigma_2^2 \sigma_2^3 \right) C^\dagger B^\dagger A^\dagger \\ &= \frac{1}{4} ABC (\cos \gamma - \sin \gamma i\sigma_2^1 \sigma_2^2 \sigma_2^3) \\ &(i\sigma_3^1 + i\sigma_3^2 + i\sigma_3^3 - i\sigma_3^1 \sigma_3^2 \sigma_3^3) C^\dagger B^\dagger A^\dagger \\ &= \frac{1}{4} \cos \gamma (R_3 + S_3 + T_3 - R_3 S_3 T_3) \\ &+ \sin \gamma (R_1 S_2 T_2 + R_2 S_1 T_2 + R_2 S_2 T_1 - R_1 S_1 T_1) \end{aligned} \quad (16)$$

where  $R_k = iA\sigma_k A^\dagger$ ,  $S_k = iB\sigma_k B^\dagger$ ,  $T_k = iC\sigma_k C^\dagger$ . We also calculate

$$\begin{aligned} \psi E \psi^\dagger &= \frac{1}{4} ABC \left( \cos \frac{\gamma}{2} - \sin \frac{\gamma}{2} i\sigma_2^1 \sigma_2^2 \sigma_2^3 \right) \\ &(1 - i\sigma_3^1 \sigma_3^2 - i\sigma_3^1 \sigma_3^3 - i\sigma_3^2 \sigma_3^3) \\ &\times \left( \cos \frac{\gamma}{2} + \sin \frac{\gamma}{2} i\sigma_2^1 \sigma_2^2 \sigma_2^3 \right) C^\dagger B^\dagger A^\dagger \\ &= \frac{1}{4} ABC (1 - i\sigma_3^1 \sigma_3^2 - i\sigma_3^1 \sigma_3^3 - i\sigma_3^2 \sigma_3^3) C^\dagger B^\dagger A^\dagger \\ &= \frac{1}{4} (1 - R_3 S_3 - R_3 T_3 - S_3 T_3). \end{aligned} \quad (17)$$

For measurement defined with  $K = e^{-i\kappa\sigma_2^1/2}$ ,  $L = e^{-i\kappa\sigma_2^2/2}$  and  $M = e^{-i\kappa\sigma_2^3/2}$  allowing a rotation of the detectors by an angle  $\kappa$ , where we have written  $\kappa^i \sigma_2^i$  as  $\kappa\sigma_2^i$ , we find

$$\begin{aligned} \phi J \phi^\dagger &= \\ \frac{1}{4} (i\sigma_3^1 e^{i\kappa\sigma_2^1} + i\sigma_3^2 e^{i\kappa\sigma_2^2} + i\sigma_3^3 e^{i\kappa\sigma_2^3} - i\sigma_3^1 \sigma_3^2 \sigma_3^3 e^{i\kappa\sigma_2^1} e^{i\kappa\sigma_2^2} e^{i\kappa\sigma_2^3}) \end{aligned} \quad (18a)$$

$$\begin{aligned} \phi E \phi^\dagger &= \\ \frac{1}{4} (1 - i\sigma_3^1 \sigma_3^2 e^{i\kappa\sigma_2^1} e^{i\kappa\sigma_2^2} - i\sigma_3^1 \sigma_3^3 e^{i\kappa\sigma_2^1} e^{i\kappa\sigma_2^3} - i\sigma_3^2 \sigma_3^3 e^{i\kappa\sigma_2^2} e^{i\kappa\sigma_2^3}). \end{aligned} \quad (18b)$$

From Eq. (13) we find

$$\begin{aligned} 2\langle \psi | E \psi^\dagger \phi E \phi^\dagger \rangle &= \frac{1}{8} (1 - R_3 S_3 - R_3 T_3 - S_3 T_3) \\ &\times (1 - i\sigma_3^1 \sigma_3^2 e^{i\kappa\sigma_2^1} e^{i\kappa\sigma_2^2} - i\sigma_3^1 \sigma_3^3 e^{i\kappa\sigma_2^1} e^{i\kappa\sigma_2^3} - i\sigma_3^2 \sigma_3^3 e^{i\kappa\sigma_2^2} e^{i\kappa\sigma_2^3}) \\ &= \frac{1}{8} [1 + (-)^{l+m} X(\kappa^1) Y(\kappa^2) + (-)^{l+n} X(\kappa^1) Z(\kappa^3) \\ &+ (-)^{m+n} Y(\kappa^2) Z(\kappa^3)] \\ &= \frac{1}{8} [1 + (-)^{l+m} X_l Y_j + (-)^{l+n} X_l Z_k + (-)^{m+n} Y_j Z_k], \end{aligned} \quad (19)$$

where  $l, m, n \in \{0, 1\}$  refers to measuring a  $|0\rangle$  or  $|1\rangle$  state, respectively, and using the standard results listed in the Appendix S1, we have

$$X_i = X(\kappa_i^1) = \cos \alpha_1 \cos \kappa_i^1 + \cos \alpha_3 \sin \alpha_1 \sin \kappa_i^1, \quad (20a)$$

$$Y_j = Y(\kappa_j^2) = \cos \beta_1 \cos \kappa_j^2 + \cos \beta_3 \sin \beta_1 \sin \kappa_j^2, \quad (20b)$$

$$Z_k = Z(\kappa_k^3) = \cos \chi_1 \cos \kappa_k^3 + \cos \chi_3 \sin \chi_1 \sin \kappa_k^3, \quad (20c)$$

with  $i, j, k \in \{1, 2\}$ , representing the two measurement directions

available to each player. Also from Eq. (13) we have

$$\begin{aligned}
 -2\langle\psi|J\psi^\dagger\phi J\phi^\dagger\rangle &= -\frac{1}{8}\langle(\cos\gamma(R_3+S_3+T_3-R_3S_3T_3) \\
 &+ \sin\gamma(R_1S_2T_2+R_2S_1T_2+R_2S_2T_1-R_1S_1T_1)) \\
 &\times (I\sigma_3^1e^{i\kappa\sigma_2^1}+I\sigma_3^2e^{i\kappa\sigma_2^2}+I\sigma_3^3e^{i\kappa\sigma_2^3}-I\sigma_3^1I\sigma_3^2I\sigma_3^3e^{i\kappa\sigma_2^1}e^{i\kappa\sigma_2^2}e^{i\kappa\sigma_2^3})\rangle_0 \\
 &= \frac{1}{8}(\cos\gamma((-)^lX_i+(-)^mY_j+(-)^nZ_k+(-)^{lmn}X_iY_jZ_k) \quad (21) \\
 &+ (-)^{lmn}\sin\gamma(F_iV_jW_k+U_iG_jW_k+U_iV_jH_k-F_iG_jH_k)) \\
 &= \frac{1}{8}[\cos\gamma\{(-)^lX_i+(-)^mY_j+(-)^nZ_k+(-)^{lmn}X_iY_jZ_k\} \\
 &+ (-)^{lmn}\sin\gamma\Theta_{ijk}],
 \end{aligned}$$

where

$$\begin{aligned}
 F_i = F(\kappa^1) &= -\sin\kappa_i^1(\cos\alpha_1\cos\alpha_2\cos\alpha_3 - \sin\alpha_2\sin\alpha_3) \\
 &+ \sin\alpha_1\cos\alpha_2\cos\kappa_i^1, \quad (22a)
 \end{aligned}$$

$$\begin{aligned}
 G_j = G(\kappa^2) &= -\sin\kappa_j^2(\cos\beta_1\cos\beta_2\cos\beta_3 - \sin\beta_2\sin\beta_3) \\
 &+ \sin\beta_1\cos\beta_2\cos\kappa_j^2, \quad (22b)
 \end{aligned}$$

$$\begin{aligned}
 H_k = H(\kappa^3) &= -\sin\kappa_k^3(\cos\chi_1\cos\chi_2\cos\chi_3 - \sin\chi_2\sin\chi_3) \\
 &+ \sin\chi_1\cos\chi_2\cos\kappa_k^3 \quad (22c)
 \end{aligned}$$

and

$$\begin{aligned}
 U_i = U(\kappa^1) &= \sin\kappa_i^1(\cos\alpha_2\sin\alpha_3 + \sin\alpha_2\cos\alpha_3\cos\alpha_1) \\
 &- \sin\alpha_1\sin\alpha_2\cos\kappa_i^1, \quad (23a)
 \end{aligned}$$

$$\begin{aligned}
 V_j = V(\kappa^2) &= \sin\kappa_j^2(\cos\beta_2\sin\beta_3 + \sin\beta_2\cos\beta_3\cos\beta_1) \\
 &- \sin\beta_1\sin\beta_2\cos\kappa_j^2, \quad (23b)
 \end{aligned}$$

$$\begin{aligned}
 W_k = W(\kappa^3) &= \sin\kappa_k^3(\cos\chi_2\sin\chi_3 + \sin\chi_2\cos\chi_3\cos\chi_1) \\
 &- \sin\chi_1\sin\chi_2\cos\kappa_k^3 \quad (23c)
 \end{aligned}$$

and

$$\Theta_{ijk} = F_iV_jW_k + U_iG_jW_k + U_iV_jH_k - F_iG_jH_k. \quad (24)$$

So we find from Eq. (13) the probability to observe a particular state after measurement as

$$\begin{aligned}
 P_{lmn} &= \frac{1}{8}[1 + \cos\gamma\{(-)^lX_i + (-)^mY_j + (-)^nZ_k\} \\
 &+ (-)^{lm}X_iY_j + (-)^{ln}X_iZ_k + (-)^{mn}Y_jZ_k \quad (25) \\
 &+ (-)^{lmn}\{\cos\gamma X_iY_jZ_k + \sin\gamma\Theta_{ijk}\}].
 \end{aligned}$$

For instance, at  $\gamma=0$  we obtain

$$P_{lmn} = \frac{1}{8}(1 + (-)^lX_i)(1 + (-)^mY_j)(1 + (-)^nZ_k), \quad (26)$$

which shows a product state, as expected. Alternatively with general entanglement, but no operation on the third qubit, that is  $\chi_i=0$ , we have

$$\begin{aligned}
 P_{lm} &= \frac{1}{8}[1 + \cos\gamma\{(-)^lX_i + (-)^mY_j + 1 + (-)^{lmn}X_iY_j\} \\
 &+ (-)^{lm}X_iY_j + (-)^lX_i + (-)^mY_j]. \quad (27) \\
 &= \frac{1}{8}[(1 + \cos\gamma)(1 + (-)^lX_i)(1 + (-)^mY_j)],
 \end{aligned}$$

which shows that for the GHZ type entanglement each pair of qubits is mutually unentangled.

### Obtaining the payoff relations

We extend the approach of Ichikawa and Tsutsui [47] to three qubits and represent the permutation of signs introduced by the measurement process. For Alice we define

$$a_{000} = \frac{1}{8}\sum_{ijk}G_{ijk}^A, \quad a_{100} = \frac{1}{8}\sum_{ijk}(-)^iG_{ijk}^A, \quad (28a)$$

$$a_{010} = \frac{1}{8}\sum_{ijk}(-)^jG_{ijk}^A, \quad a_{001} = \frac{1}{8}\sum_{ijk}(-)^kG_{ijk}^A, \quad (28b)$$

$$a_{110} = \frac{1}{8}\sum_{ijk}(-)^{i+j}G_{ijk}^A, \quad a_{011} = \frac{1}{8}\sum_{ijk}(-)^{j+k}G_{ijk}^A, \quad (28c)$$

$$a_{101} = \frac{1}{8}\sum_{ijk}(-)^{i+k}G_{ijk}^A, \quad a_{111} = \frac{1}{8}\sum_{ijk}(-)^{i+j+k}G_{ijk}^A. \quad (28d)$$

Using Eq. (4), we then can find the payoff for each player

$$\begin{aligned}
 \Pi_A(\kappa_i^1, \kappa_j^2, \kappa_k^3) &= a_{000} + \cos\gamma\{a_{100}X_i + a_{010}Y_j + a_{001}Z_k\} \\
 &+ a_{110}X_iY_j + a_{101}X_iZ_k + a_{011}Y_jZ_k \\
 &+ a_{111}\{\cos\gamma X_iY_jZ_k + \sin\gamma\Theta_{ijk}\}, \quad (29a)
 \end{aligned}$$

$$\begin{aligned}
 \Pi_B(\kappa_i^1, \kappa_j^2, \kappa_k^3) &= b_{000} + \cos\gamma\{b_{100}X_i + b_{010}Y_j + b_{001}Z_k\} \\
 &+ b_{110}X_iY_j + b_{101}X_iZ_k + b_{011}Y_jZ_k \\
 &+ b_{111}\{\cos\gamma X_iY_jZ_k + \sin\gamma\Theta_{ijk}\}, \quad (29b)
 \end{aligned}$$

$$\begin{aligned}
 \Pi_C(\kappa_i^1, \kappa_j^2, \kappa_k^3) &= c_{000} + \cos\gamma\{c_{100}X_i + c_{010}Y_j + c_{001}Z_k\} \\
 &+ c_{110}X_iY_j + c_{101}X_iZ_k + c_{011}Y_jZ_k \\
 &+ c_{111}\{\cos\gamma X_iY_jZ_k + \sin\gamma\Theta_{ijk}\}, \quad (29c)
 \end{aligned}$$

where, as Eqs. (20) show, the three measurement directions

$\kappa_i^1, \kappa_j^2, \kappa_k^3$  are held in  $X_i, Y_i, Z_i$ . Alternatively, in order to produce other quantum game frameworks [7,48], we can interpret the rotors  $A, B, C$ , held in  $X_i, Y_i, Z_i$ , as the unitary operations which can be applied by each player to their qubit, where in this case, the measurement directions will be set by the referee.

**Mixed-strategy payoff relations.** For a mixed strategy game, Alice, Bob and Chris choose their first measurement directions  $\kappa_i^1, \kappa_j^2, \kappa_k^3$  with probabilities  $x, y$  and  $z$  respectively, where  $x, y, z \in [0, 1]$  and hence choose the directions  $\kappa_2^1, \kappa_2^2, \kappa_2^3$  with probabilities  $(1-x), (1-y), (1-z)$ , respectively. Alice's payoff is now given as

$$\begin{aligned} \Pi_A(x, y, z) &= xyz \sum_{i,j,k=0}^1 P_{ijk}(\kappa_i^1, \kappa_j^2, \kappa_k^3) G_{ijk} + x(1-y)z \sum_{i,j,k=0}^1 P_{ijk}(\kappa_i^1, \kappa_j^2, \kappa_k^3) G_{ijk} \\ &+ (1-x)yz \sum_{i,j,k=0}^1 P_{ijk}(\kappa_i^1, \kappa_j^2, \kappa_k^3) G_{ijk} + (1-x)(1-y)z \\ &\sum_{i,j,k=0}^1 P_{ijk}(\kappa_i^1, \kappa_j^2, \kappa_k^3) G_{ijk} \\ &+ xy(1-z) \sum_{i,j,k=0}^1 P_{ijk}(\kappa_i^1, \kappa_j^2, \kappa_k^3) G_{ijk} + x(1-y)(1-z) \\ &\sum_{i,j,k=0}^1 P_{ijk}(\kappa_i^1, \kappa_j^2, \kappa_k^3) G_{ijk} \\ &+ (1-x)y(1-z) \sum_{i,j,k=0}^1 P_{ijk}(\kappa_i^1, \kappa_j^2, \kappa_k^3) G_{ijk} \\ &+ (1-x)(1-y)(1-z) \sum_{i,j,k=0}^1 P_{ijk}(\kappa_i^1, \kappa_j^2, \kappa_k^3) G_{ijk}. \end{aligned} \quad (30)$$

**Payoff relations for a symmetric game.** For a symmetric game we have  $\Pi_A(x, y, z) = \Pi_A(x, z, y) = \Pi_B(y, x, z) = \Pi_B(z, x, y) = \Pi_C(y, z, x) = \Pi_C(z, y, x)$ . This requires  $a_{111} = b_{111} = c_{111}$ ,  $a_{000} = b_{000} = c_{000}$ ,  $a_{110} = b_{110} = a_{101} = c_{101} = b_{011} = c_{011}$ ,  $b_{100} = c_{100} = a_{010} = c_{010} = a_{001} = b_{001}$ ,  $a_{100} = b_{010} = c_{001}$  and  $a_{011} = b_{101} = c_{110}$ . The payoff relations (0) are then reduced to

$$\begin{aligned} \Pi_A(\kappa_i^1, \kappa_j^2, \kappa_k^3) &= a_{000} + \cos \gamma \{a_{100} X_i + a_{001} Y_j + a_{001} Z_k\} \\ &+ a_{110} X_i \{Y_j + Z_k\} + a_{011} Y_j Z_k + a_{111} \{\cos \gamma X_i Y_j Z_k + \sin \gamma \Theta_{ijk}\}, \end{aligned} \quad (31a)$$

$$\begin{aligned} \Pi_B(\kappa_i^1, \kappa_j^2, \kappa_k^3) &= a_{000} + \cos \gamma \{a_{001} X_i + a_{100} Y_j + a_{001} Z_k\} \\ &+ a_{110} Y_j \{X_i + Z_k\} + a_{011} X_i Z_k + a_{111} \{\cos \gamma X_i Y_j Z_k + \sin \gamma \Theta_{ijk}\}, \end{aligned} \quad (31b)$$

$$\begin{aligned} \Pi_C(\kappa_i^1, \kappa_j^2, \kappa_k^3) &= a_{000} + \cos \gamma \{a_{001} X_i + a_{001} Y_j + a_{100} Z_k\} \\ &+ a_{110} Z_k \{X_i + Y_j\} + a_{011} X_i Y_j + a_{111} \{\cos \gamma X_i Y_j Z_k + \sin \gamma \Theta_{ijk}\}. \end{aligned} \quad (31c)$$

### Embedding the classical game

If we consider a strategy triplet  $(x, y, z) = (0, 1, 0)$  for example, at zero entanglement, then the payoff to Alice is obtained from Eq.

(30) to be

$$\begin{aligned} \Pi_A(x, y, z) &= \frac{1}{8} [G_{000}(1+X_2)(1+Y_1)(1+Z_2) + G_{100}(1-X_2)(1+Y_1)(1+Z_2) \\ &+ G_{010}(1+X_2)(1-Y_1)(1+Z_2) + G_{110}(1-X_2)(1-Y_1)(1+Z_2) \\ &+ G_{001}(1+X_2)(1+Y_1)(1-Z_2) + G_{101}(1-X_2)(1+Y_1)(1-Z_2) \\ &+ G_{011}(1+X_2)(1-Y_1)(1-Z_2) + G_{111}(1-X_2)(1-Y_1)(1-Z_2)]. \end{aligned}$$

Hence, in order to achieve the classical payoff of  $G_{101}$  for this triplet, we can see that we require  $X_2 = -1$ ,  $Y_1 = +1$  and  $Z_2 = -1$ .

This shows that we can select any required classical payoff by the appropriate selection of  $X_i, Y_i, Z_i = \pm 1$ . Referring to Eq. (20), we therefore have the conditions for obtaining classical mixed-strategy payoff relations as

$$X_i = \cos \alpha_1 \cos \kappa_i^1 + \cos \alpha_3 \sin \alpha_1 \sin \kappa_i^1 = \pm 1, \quad (33a)$$

$$Y_j = \cos \beta_1 \cos \kappa_j^2 + \cos \beta_3 \sin \beta_1 \sin \kappa_j^2 = \pm 1, \quad (33b)$$

$$Z_k = \cos \chi_1 \cos \kappa_k^3 + \cos \chi_3 \sin \chi_1 \sin \kappa_k^3 = \pm 1. \quad (33c)$$

For the equation for Alice, we have two classes of solution: If  $\alpha_3 \neq 0$ , then for the equations satisfying  $X_2 = Y_2 = Z_2 = -1$  we have for Alice in the first equation  $\alpha_1 = 0$ ,  $\kappa_2^1 = \pi$  or  $\alpha_1 = \pi$ ,  $\kappa_2^1 = 0$  and for the equations satisfy  $X_1 = Y_1 = Z_1 = +1$  we have  $\alpha_1 = \kappa_1^1 = 0$  or  $\alpha_1 = \kappa_1^1 = \pi$ , which can be combined to give either  $\alpha_1 = 0$ ,  $\kappa_1^1 = 0$  and  $\kappa_2^1 = \pi$  or  $\alpha_1 = \pi$ ,  $\kappa_1^1 = \pi$  and  $\kappa_2^1 = 0$ . For the second class with  $\alpha_3 = 0$  we have the solution  $\alpha_1 - \kappa_2^1 = \pi$  and for  $X_1 = Y_1 = Z_1 = +1$  we have  $\alpha_1 - \kappa_2^1 = 0$ .

So in summary for both cases we have that the two measurement directions are  $\pi$  out of phase with each other, and for the first case ( $\alpha_3 \neq 0$ ) we can freely vary  $\alpha_2$  and  $\alpha_3$ , and for the second case ( $\alpha_3 = 0$ ), we can freely vary  $\alpha_1$  and  $\alpha_2$  to change the initial quantum quantum state without affecting the game Nash equilibrium (NE) or payoffs [1,2]. The same arguments hold for the equations for  $Y$  and  $Z$ . Using these results in Eq. (24) we find that  $\Theta_{ijk} = 0$ .

We have the associated payoff for Alice

$$\begin{aligned} \Pi_A(x, y, z) &= \frac{1}{2} [G_{000} + G_{111} - \cos \gamma (G_{000} - G_{111}) \\ &- 4(y+z)(a_{110} + a_{011}) + \cos \gamma \{4x(a_{111} + a_{100}) \\ &+ 4(a_{111} + a_{001})(y+z)\} + 8xa_{110}(y+z-1) + 8yza_{011} \\ &- 8a_{111} \cos \gamma \{xy+xz+yz-2xyz\}]. \end{aligned} \quad (34)$$

Setting  $\gamma = 0$  in Eq. (34) we find Alice's payoff as

$$\begin{aligned} \Pi_A(x, y, z) &= G_{111} + x(G_{011} - G_{111}) + y(G_{110} - G_{111}) \\ &+ z(G_{110} - G_{111}) + 4xy(a_{110} - a_{111}) + 4xz(a_{110} - a_{111}) \\ &+ 4yz(a_{011} - a_{111}) + 8xyz a_{111}, \end{aligned} \quad (35)$$

which has the same payoff structure as the mixed-strategy version of the classical game.

Now, we can also write the equations governing the NE as

$$\begin{aligned}
 & \Pi_A(x^*, y^*, z^*) - \Pi_A(x, y^*, z^*) \\
 &= (x^* - x)[a_{110}(2y^* - 1) + a_{101}(2z^* - 1) \\
 &+ \cos \gamma \{a_{100} + a_{111}(2y^* - 1)(2z^* - 1)\}] \geq 0 \\
 & \Pi_B(x^*, y^*, z^*) - \Pi_B(x^*, y, z^*) \\
 &= (y^* - y)[b_{110}(2x^* - 1) + b_{011}(2z^* - 1) \\
 &+ \cos \gamma \{b_{010} + b_{111}(2x^* - 1)(2z^* - 1)\}] \geq 0 \\
 & \Pi_C(x^*, y^*, z^*) - \Pi_C(x^*, y^*, z) \\
 &= (z^* - z)[c_{101}(2x^* - 1) + c_{011}(2y^* - 1) \\
 &+ \cos \gamma \{c_{001} + c_{111}(2x^* - 1)(2y^* - 1)\}] \geq 0,
 \end{aligned} \quad (36)$$

where the strategy triple  $(x^*, y^*, z^*)$  is a NE. Using the conditions defined earlier for a symmetric game, we can reduce our equations governing the NE for the three players to

$$\begin{aligned}
 & (x^* - x)[2a_{110}(y^* + z^* - 1) \\
 &+ \cos \gamma \{a_{100} + a_{111}(2y^* - 1)(2z^* - 1)\}] \geq 0,
 \end{aligned} \quad (37a)$$

$$\begin{aligned}
 & (y^* - y)[2a_{110}(x^* + z^* - 1) \\
 &+ \cos \gamma \{a_{100} + a_{111}(2x^* - 1)(2z^* - 1)\}] \geq 0,
 \end{aligned} \quad (37b)$$

$$\begin{aligned}
 & (z^* - z)[2a_{110}(x^* + y^* - 1) \\
 &+ \cos \gamma \{a_{100} + a_{111}(2x^* - 1)(2y^* - 1)\}] \geq 0
 \end{aligned} \quad (37c)$$

We can see that the new quantum behavior is governed solely by the payoff matrix through  $a_{100}$ ,  $a_{110}$  and  $a_{111}$  and by the entanglement angle  $\gamma$ , and not by other properties of the quantum state.

For completeness, we have Bob's payoff, in the symmetric case, as

$$\begin{aligned}
 \Pi_B(x, y, z) &= \frac{1}{2}[G_{000} + G_{111} - \cos \gamma(G_{000} - G_{111}) \\
 &- 4(x + z)(a_{110} + a_{011}) + \cos \gamma 4y(a_{111} + a_{100}) \\
 &+ 4(x + z)(a_{111} + a_{001}) + 8ya_{110}(x + z - 1) + 8xz a_{011} \\
 &- 8a_{111} \cos \gamma \{xy + xz + yz - 2xyz\}].
 \end{aligned} \quad (38)$$

The mixed NE for all players is

$$x^* = y^* = z^* = \frac{-a_{110} + \cos \gamma a_{111} \pm \sqrt{a_{110}^2 - \cos \gamma a_{100} a_{111}}}{2 \cos \gamma a_{111}}. \quad (39)$$

**Maximally entangled case.** For  $\gamma = \pi/2$  at maximum entanglement for both NE of  $(x^*, y^*, z^*) = (0, 0, 0)$  and  $(x^*, y^*, z^*) = (1, 1, 1)$  we have the payoff

$$\Pi_A(x^*, y^*, z^*) = \Pi_B(x^*, y^*, z^*) = \Pi_C(x^*, y^*, z^*) = \frac{1}{2}(G_{000} + G_{111}) \quad (40)$$

which gives the average of the two corners of the payoff matrix, which is as expected.

**Prisoners' Dilemma.** An example of a three-player PD game is shown in Table 1. For this game, from Eq. (28), we have  $a_{000} = 32/8$ ,  $a_{001} = 14/8$ ,  $a_{010} = 14/8$ ,  $a_{011} = 0$ ,  $a_{100} = -8/8$ ,  $a_{101} = -2/8$ ,  $a_{110} = -2/8$ ,  $a_{111} = 0$ , with the NE from Eqs. (37) given by

$$(x^* - x)[-(y^* + z^* - 1) - 2 \cos \gamma] \geq 0, \quad (41a)$$

$$(y^* - y)[-(x^* + z^* - 1) - 2 \cos \gamma] \geq 0, \quad (41b)$$

$$(z^* - z)[-(x^* + y^* - 1) - 2 \cos \gamma] \geq 0. \quad (41c)$$

We have the classical NE of  $(x^*, y^*, z^*) = (0, 0, 0)$  for  $\cos \gamma = 1$ , but we have a phase transition, as the entanglement increases, at  $\cos \gamma = \frac{1}{2}$  where we find the new NE  $(x^*, y^*, z^*) = (1, 0, 0)$ ,  $(x^*, y^*, z^*) = (0, 1, 0)$  and  $(x^*, y^*, z^*) = (0, 0, 1)$ . The payoff for Alice from Eq. (34) is given by

$$\begin{aligned}
 \Pi_A(x, y, z) &= \frac{1}{2}[7 + 2x + (y + z)(1 - 2x) \\
 &- \cos \gamma \{5 + 4x - 7(y + z)\}].
 \end{aligned} \quad (42)$$

For the classical region we have  $\Pi_A(0, 0, 0) = \Pi_B(0, 0, 0) = \Pi_C(0, 0, 0) = \frac{7}{2} - \frac{5}{2} \cos \gamma$ , which is graphed in Fig. 2 along with other parts of the phase diagram. It should be noted that  $\cos \gamma$  can go negative, which will produce a mirror image about the vertical axis of the current graph. That is for  $\cos \gamma$  decreasing from  $-\frac{1}{2}$  to  $-1$ , we have a NE of  $(x^*, y^*, z^*) = (1, 1, 1)$ , falling from 2.25 down to 1. We will also have the NE of  $(x^*, y^*, z^*) = (1, 1, 0)$  and  $(x^*, y^*, z^*) = (0, 1, 1)$  for  $-\frac{1}{2} \cos \gamma < 0$ .

This graph also illustrates the value of coalitions, because if Bob and Chris both agree to implement the same strategy, then the only NE available for  $0 < \cos \gamma < \frac{1}{2}$  for example, is  $(x^*, y^*, z^*) = (1, 0, 0)$ . However, for a NE in the region of  $\cos \gamma$  just less than one half, both Bob and Chris receive a significantly greater payoff, of around 4.5 units, as opposed to 2.5 for Alice, so the coalition will receive nearly twice the payoff.

**Table 1.** An example of three-player Prisoners' Dilemma.

| State  | $ 000\rangle$ | $ 001\rangle$ | $ 010\rangle$ | $ 100\rangle$ | $ 011\rangle$ | $ 101\rangle$ | $ 110\rangle$ | $ 111\rangle$ |
|--------|---------------|---------------|---------------|---------------|---------------|---------------|---------------|---------------|
| Payoff | (6,6,6)       | (3,3,9)       | (3,9,3)       | (9,3,3)       | (0,5,5)       | (5,0,5)       | (5,5,0)       | (1,1,1)       |

The payoff for each player (one,two,three), for each measurement outcome.  
doi:10.1371/journal.pone.0021623.t001

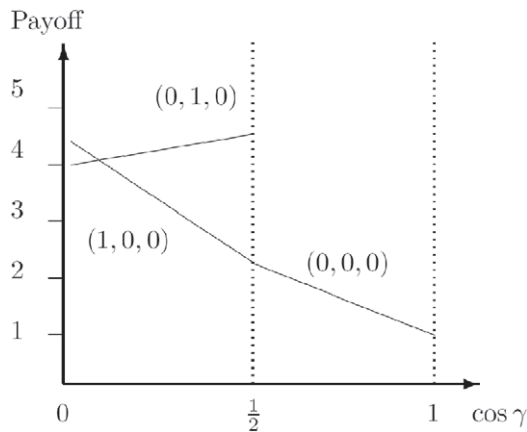

**Figure 2. Phase structure for Alice in quantum PD game using EPR setting.** For the PD example given in Table 1, the classical outcome of (0,0,0), is still returned for low entanglement,  $\cos \gamma > \frac{1}{2}$ , but with new NE arising at higher entanglement. As the game is symmetric, we have  $\Pi_A(0,1,0) = \Pi_A(0,0,1)$  and the NE (0,0,1) is not shown. doi:10.1371/journal.pone.0021623.g002

### Players sharing the W state

The second type of three particle entangled state [49] is the W state

$$\psi = -ABC \frac{1}{\sqrt{3}} (\iota \sigma_2^1 + \iota \sigma_2^2 + \iota \sigma_2^3), \quad (43)$$

where once again we have used the three rotors  $A$ ,  $B$  and  $C$  in order to generalize the state as far as possible. So proceeding as for the GHZ state, the probability that a particular state will be observed after measurement can be found to be

$$\begin{aligned} P_{lmn} = & \frac{1}{24} [3 + (-)^l X_i + (-)^m Y_j + (-)^n Z_k \\ & + (-)^{l+m+n} (2(X_i G_j H_k + F_i Y_j H_k + F_i G_j Z_k + X_i V_j W_k \\ & + U_i Y_j W_k + U_i V_j Z_k) - 3X_i Y_j Z_k) \\ & + (-)^{l+m} (2F_i G_j + 2U_i V_j - X_i Y_j) \\ & + (-)^{l+n} (2F_i H_k + 2U_i W_k - X_i Z_k) \\ & + (-)^{m+n} (2G_j H_k + 2V_j W_k - Y_j Z_k)]. \end{aligned} \quad (44)$$

Clearly the same probability distribution would be found for the second type of W state, shown in Eq. (3), because it is simply an inverse of this state.

**Obtaining the pure-strategy payoff relations.** With players sharing a W state, referring to Eq. (28), we introduce the following notation for Alice

$$a'_{xyz} = \frac{1}{3} a_{xyz}. \quad (45)$$

Using the payoff function given by Eq. (4), we then find for Alice

$$\begin{aligned} \Pi_A(\kappa_i^1, \kappa_j^2, \kappa_k^3) = & 3a'_{000} + a'_{100} X_i + a'_{010} Y_j + a'_{001} Z_k + a'_{011} (2G_j H_k + 2V_j W_k - Y_j Z_k) \\ & + a'_{110} (2F_i G_j + 2U_i V_j - X_i Y_j) + a'_{101} (2F_i H_k + 2U_i W_k - X_i Z_k) \\ & + a'_{111} [2\{X_i G_j H_k + F_i Y_j H_k + F_i G_j Z_k + X_i V_j W_k + U_i Y_j W_k + U_i V_j Z_k\} \\ & - 3X_i Y_j Z_k]. \end{aligned} \quad (46)$$

Similarly for other players, simply by switching to their payoff matrix in place of Alices'.

Obviously for the W state there is no way to turn off the entanglement and so it is not possible to embed a classical game, hence we now turn to a more general state which is in a superposition of the GHZ and W type states.

### Games with general three-qubit state

It is noted in Ref. [49] that there are two inequivalent classes of tripartite entanglement, represented by the GHZ and W states. More specifically, Ref. [50] finds a general three qubit pure state

$$|\psi\rangle_3 = \lambda_0|000\rangle + \lambda_1 e^{i\phi}|100\rangle + \lambda_2|101\rangle + \lambda_3|110\rangle + \lambda_4|111\rangle \quad (47)$$

where  $\lambda_i, \phi \in \mathbb{R}$ , with  $\lambda_i \geq 0$ ,  $0 \leq \phi \leq \pi$  and  $\sum_{i=0}^4 \lambda_i^2 = 1$ .

We have a 1 : 1 mapping from complex spinors to GA given in Eq. (9), so we will have a general three qubit state represented in GA as

$$\begin{aligned} \psi = ABC[ & \lambda_0 - \lambda_1 \cos \chi \iota \sigma_2^1 + \lambda_1 \sin \chi \iota \sigma_1^1 \\ & + \lambda_2 \iota \sigma_2^1 \iota \sigma_2^3 + \lambda_3 \iota \sigma_2^1 \sigma_2^2 - \lambda_4 \iota \sigma_2^1 \sigma_2^2 \sigma_2^3], \end{aligned} \quad (48)$$

which with the rotors gives us 15 degrees of freedom.

We desire though, a symmetrical three-qubit state in order to guarantee a fair game and so we construct

$$\begin{aligned} |\psi\rangle_3 = & \rho_0|000\rangle + \rho_1(|001\rangle + |010\rangle + |100\rangle) \\ & + \rho_2(|011\rangle + |101\rangle + |110\rangle) + \rho_3|111\rangle \end{aligned} \quad (49)$$

as the most general symmetrical three qubit quantum state, with  $\rho_i$  subject to the conventional normalization conditions. We might think to add complex phases to the four terms, however we find that this addition has no effect on the payoff or the NE and so can be neglected. This symmetrical state can be represented in GA, by referring to Eq. (11), as

$$\begin{aligned} \psi = ABC[ & \cos \frac{\gamma}{2} \cos \frac{\phi}{2} + \sin \frac{\phi}{2} \sin \frac{\delta}{2} (\iota \sigma_2^1 + \iota \sigma_2^2 + \iota \sigma_2^3) / \sqrt{3} \\ & + \sin \frac{\phi}{2} \cos \frac{\delta}{2} (\iota \sigma_2^1 \iota \sigma_2^2 + \iota \sigma_2^1 \sigma_2^3 + \iota \sigma_2^2 \sigma_2^3) \\ & / \sqrt{3} + \sin \frac{\gamma}{2} \cos \frac{\phi}{2} \iota \sigma_2^1 \iota \sigma_2^2 \iota \sigma_2^3]. \end{aligned} \quad (50)$$

If we set  $\gamma = 0$  and  $\phi = 0$  we find the product state  $|000\rangle$ , which we will constrain to return the classical game as for the GHZ state. For  $\gamma = \pi/2$  and  $\phi = 0$  we produce the maximally entangled GHZ state and for  $\phi = \pi$  we have the W type states in a superposition controlled by  $\delta$ . Using Eq. (50) and following the same calculation path used for the GHZ state, we can arrive at the NE, using the same condition for classical embedding as for the GHZ state, finding for Alice

$$\begin{aligned} \Pi_A(x^*, y^*, z^*) - \Pi_A(x, y^*, z^*) = & (x^* - x)[3(a_{100} + U_2) \cos \gamma (1 + \cos \phi) \\ & + 2U_1(1 + 2 \cos \phi) - (a_{100} - 3U_2)(1 - \cos \phi) \cos \delta], \end{aligned} \quad (51)$$

where

$$U_1 = a_{110}(2y^* - 1) + a_{101}(2z^* - 1) = 2a_{110}(y^* + z^* - 1) \quad (52a)$$

$$U_2 = a_{111}(1 - 2y^*)(1 - 2z^*). \quad (52b)$$

We can see the effect of the W type states in the  $\cos \delta$  term and so it illustrates how both types of W states contribute. The reason they can both appear is because by demanding the classical embedding we have severely restricted the available unitary transformations available to transform the starting state.

**The payoff relations.** The payoff function for Alice given by

$$\begin{aligned} \Pi_A = & a_{000} - \frac{1}{2}(V_1 + V_3) \cos \gamma (1 + \cos \phi) + \frac{1}{3} V_2 (1 + 2 \cos \phi) \\ & + \frac{1}{6} (V_1 - 3V_3) (1 - \cos \phi) \cos \delta, \end{aligned} \quad (53)$$

where

$$V_1 = a_{100}(1 - 2x) + a_{010}(1 - 2y) + a_{001}(1 - 2z) \quad (54a)$$

$$\begin{aligned} V_2 = & a_{110}(1 - 2x)(1 - 2y) \\ & + a_{101}(1 - 2x)(1 - 2z) + a_{011}(1 - 2y)(1 - 2z) \end{aligned} \quad (54b)$$

$$V_3 = a_{111}(1 - 2x)(1 - 2y)(1 - 2z). \quad (54c)$$

The payoff for Bob and Chris found by simply replacing  $a_{ijk}$  with  $b_{ijk}$  and  $c_{ijk}$  from their respective payoff matrices. When comparing with the payoff formula above with the classical result at  $(x, y, z) = (0, 0, 0)$ , it is helpful to note that  $a_{000} + a_{001} + a_{010} + a_{011} + a_{100} + a_{101} + a_{110} + a_{111} = G_{000}$  and generally  $a_{000} + (-1)^n a_{001} + (-1)^m a_{010} + (-1)^{m+n} a_{011} + (-1)^l a_{100} + (-1)^{l+n} a_{101} + (-1)^{l+m} a_{110} + (-1)^{l+m+n} a_{111} = G_{lmn}$ .

**Uniform superposition state.** If we select a uniform superposition state, with  $\rho_0 = \rho_1 = \rho_2 = \rho_3 = \frac{1}{2}$ , that is, substituting  $\gamma = \frac{\pi}{2}$ ,  $\phi = \frac{2\pi}{3}$  and  $\delta = \frac{\pi}{2}$ , giving a product state  $H^{\otimes 3}|000\rangle$ , with H being the Hadamard operator, then we find that  $\Pi_A(x^*, y^*, z^*) - \Pi_A(x, y^*, z^*) = 0$  for Alice, and similarly for the other players. That is the payoff will be independent of the player choices and Eq. (53) gives  $\Pi_A = \Pi_B = \Pi_C = a_{000}$ . Where  $a_{000}$  represents the average of all the entries in the payoff matrix, as expected for a uniform superposition state.

**Prisoners' Dilemma.** For the PD game from the previous section with the GHZ state, we found  $a_{100} = -8/8, a_{110} = -2/8, a_{111} = 0$ , so  $U_2 = 0$ , with the NE from Eq. (79) for the three players given by

$$\begin{aligned} (x^* - x)[(1 - y^* - z^*)(1 + 2 \cos \phi) - \\ 3 \cos \gamma (1 + \cos \phi) + (1 - \cos \phi) \cos \delta] \geq 0, \end{aligned} \quad (55a)$$

$$\begin{aligned} (y^* - y)[(1 - x^* - z^*)(1 + 2 \cos \phi) - \\ 3 \cos \gamma (1 + \cos \phi) + (1 - \cos \phi) \cos \delta] \geq 0, \end{aligned} \quad (55b)$$

$$\begin{aligned} (z^* - z)[(1 - x^* - y^*)(1 + 2 \cos \phi) - \\ 3 \cos \gamma (1 + \cos \phi) + (1 - \cos \phi) \cos \delta] \geq 0, \end{aligned} \quad (55c)$$

with the payoff for Alice given by

$$\begin{aligned} \Pi_A = & 4 - \frac{1}{6}(1 - 2x)(1 - y - z)(1 + 2 \cos \phi) - \\ & \frac{1}{4}(5 + 4x - 7y - 7z)[\cos \gamma (1 + \cos \phi) - \frac{1}{3}(1 - \cos \phi) \cos \delta]. \end{aligned} \quad (56)$$

We can see with  $\phi = 0$  we recover the NE for the GHZ state, in Eq. (37).

**Shifting of the NE compared to the GHZ state.** We have the classical NE of  $(x^*, y^*, z^*) = (0, 0, 0)$  for  $\cos \gamma = 1$  and  $\cos \phi = 1$ , but we can see, that once again, we have a phase transition, as the entanglement increases, to a new NE of  $(x^*, y^*, z^*) = (1, 0, 0)$ ,  $(x^*, y^*, z^*) = (0, 1, 0)$  and  $(x^*, y^*, z^*) = (0, 0, 1)$ .

The phase transition will be at  $\cos \gamma = \frac{1}{3}(2 - \cos \delta) + \frac{2 \cos \delta - 1}{3(1 + \cos \phi)}$ . We notice that as we increase the weighting towards the W state, by increasing  $\phi$ , that it becomes easier to make the phase transition in comparison to the pure GHZ state, that is, we improve access to the phase transition as we introduce the weight of the  $|011\rangle + |101\rangle + |110\rangle$  state. In fact, even at  $\cos \gamma = 1$ , we can achieve the NE of  $(x^*, y^*, z^*) = (1, 1, 1)$ , with  $\phi = \pi$ , giving a payoff of  $3\frac{1}{3}$  units.

**Maximizing the payoff.** Looking at the payoff function for Alice in Eq. (56), we can seek to maximize this function. The maximum achievable payoff is found to be 4.5, which is equal to the maximum payoff found for the GHZ state, see Fig. 2. Thus incorporating W type states into a superposition with the GHZ state, cannot improve the maximum payoff.

Observing Fig. 3, we can see that as we mix in the W state, that the phase transitions move to the right, with an extra offset available by changing  $\delta$ , and the maximum payoff obtainable, will drop below the maximum achievable of 4.5 with the pure GHZ state. Fig. 3, shows the shifted NE from 0.5 to  $2/3$  and payoffs for the case  $\phi = \frac{\pi}{2}$  and  $\delta = 0$ .

## Discussion

A quantum version of a three-player two-strategy game is explored, where the player strategy sets remain classical but their payoffs are obtained from the outcome of quantum measurement performed, as in a typical EPR experiment. If players share a product state, then the quantum games reduces itself to the classical game, thus ensuring a faithful embedding of a mixed-strategy version of a classical three-player two-strategy game within the more general quantum version of the game.

For a general three-player two-strategy game, we find the governing equation for a strategy triplet forming a NE is given by Eq. (51) with the associated payoff relations obtained in Eq. (53). At zero entanglement the quantum game returns the same triplet(s) of NE as the classical mixed-strategy game and the payoff relations in the quantum game reduce to the trilinear form given in Eq. (35), equivalent to the classical game involving mixed-strategies. We find that even though the requirement to properly embed a classical game puts significant restrictions on the initial quantum states, we still have a degree of freedom, available with the entanglement angle  $\gamma$ , with which we can generate a new NE.

As a specific example the PD was found to have a NE of  $(x^*, y^*, z^*) = (1, 1, 1)$  at high entanglement. For the GHZ state, the phase diagram is shown in Fig. 2, which is modulated with the inclusion of the W type states, by reducing the payoffs and sliding the NE closer to the classical region.

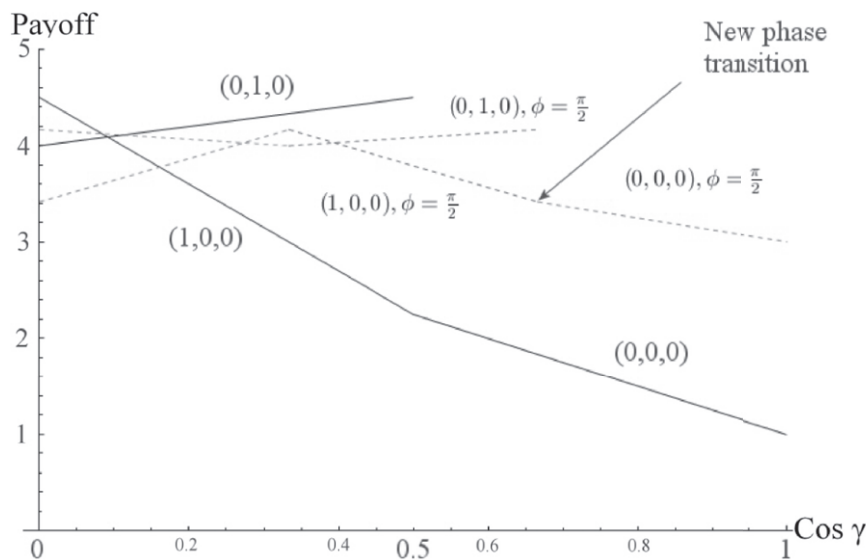

**Figure 3. Phase transition in three-player quantum Prisoners' Dilemma with a general three qubit state.** The solid lines indicate the phase transitions from Table 1, and shown in Fig. 1, with the dashed lines indicating the shifted transitions when the W-state is mixed in. We observe that new NE now arise at lower entanglement, at  $\cos \gamma = \frac{2}{3}$  as indicated by the arrow pointer.  
doi:10.1371/journal.pone.0021623.g003

As our setup for a three-player quantum game involves players performing classical strategies, our conclusions are restricted by not only players sharing GHZ or W states but also by the EPR setting that we use. The most general form of the GHZ state permits a description in terms of a single entanglement parameter  $\gamma$ . However, as the general W state involves three kets, the entanglement in such a state cannot be described by a single parameter. It appears that as for symmetric W states with equal superposition it is not possible to remove entanglement, therefore, embedding a classical game within the quantum game (while players share such states) is not possible in the EPR-type setup in which players can perform only classical strategies. Our results in this regard are general in that although they rely on the EPR setting, but not on a particular game as these use the parameters introduced in Eqs. (28a–28d) that can be evaluated for any game. Also, this is discussed in the Section 5, where games with general three-qubit symmetric states are considered, that include combination of GHZ and W states. However, the situation with sharing non-equally weighted superposition states can be entirely different, not considered in the present paper, but represents a useful extension for future work.

Our analysis shows that, with a quantization based on the EPR setting, a faithful embedding of a classical game can be achieved that also avoids an Enk-Pike type argument [32] because players' strategy sets are not extended relative to the classical game. However, with players sharing entangled states, while their strategy sets remain classical, our quantum games lead to new game-theoretic outcomes.

We also find that an analysis of three-player quantum games using Clifford's geometric algebra (GA) comes with some clear benefits, for instance, a better perception of the quantum mechanical situation involved and particularly an improved geometrical visualization of quantum mechanical operations. The same results using the familiar algebra with Pauli matrices may possibly be tractable but would certainly obscure intuition. Also, the simple expression given in (13) for the overlap probability between two quantum states in the  $N$ -particle case is another benefit of the GA approach.

The results reported in the paper can be useful in a game-theoretic analysis of the EPR paradox. Bell's consideration of the

EPR paradox usually implies the inconsistency between locality and completeness of quantum mechanics, or in more broader terms, simply the surprising nonlocal effects invoked by entanglement. However, one notices that these conclusions are merely sufficient but not necessary for the violation of Bell's inequality and that other interpretations are also reported [45,51–54], especially, the interpretation based on the non-existence of a single probability space for incompatible experimental contexts [55]. This non-existence also presents a new route in constructing quantum games and the first step in this direction was taken in Ref [56]. Because such quantum games originate directly from the violation of Bell's inequality, they allow a discussion of the EPR paradox in the context of game theory. This is also supported by the fact that for quantum games with players sharing entanglement, a game-theoretic analysis that involves Bell's settings [26–28] has been reported in Refs [57,58].

A variety of other classical games could now be adapted and applied to this three-player framework, with new NE being expected. The present study of three-player quantum games can also be naturally extended to analyze the  $N$ -player quantum games. We believe that the mathematical formalism of GA permits this in a way not possible using the usual complex matrices. Also, this extension could be fruitfully exploited in developing a game-theoretic perspective on quantum search algorithms and quantum walks. We find that our analysis can be helpful in providing an alternative viewpoint (with emphasis on underlying geometry) on multi-party entanglement shared by a group of individuals (players), while they have conflicting interests and can perform only classical actions on the quantum state. That is, a viewpoint that is motivated by the geometrical perspective that Clifford's geometric algebra provides. Such situations take place in the area of quantum communication and particularly in quantum cryptography [59–61].

## Supporting Information

**Appendix S1**  
(PDF)

## Author Contributions

Conceived and designed the experiments: JC. Wrote the paper: JC AI DA. Conceived idea and worked on manuscript: JC AI. Analysis of results and design of paper: JC DA AI. Checking results: DA AI JC.

## References

- Binmore K (2007) Game theory: a very short introduction, volume 173 Oxford University Press, USA.
- Rasmusen E (2007) Games and information: An introduction to game theory Wiley-blackwell.
- Abbott D, Davies P, Shalizi C (2002) Order from disorder: the role of noise in creative processes: a special issue on game theory and evolutionary processes-overview. *Fluct Noise Lett* 2: C1–C12.
- von Neumann J, Morgenstern O (1944) Theory of Games and Economic Behavior Princeton University Press.
- Peres A (1993) Quantum theory: concepts and methods, volume 57 Kluwer Academic Publishers.
- Meyer D (1999) Quantum strategies. *Physical Review Letters* 82: 1052–1055.
- Eisert J, Wilkens M, Lewenstein M (1999) Quantum games and quantum strategies. *Physical Review Letters* 83: 3077–3080.
- Blaquiere A (1980) Wave mechanics as a two-player game. *Dynamical Systems and Microphysics* 33.
- Wiesner S (1983) Conjugate coding. *ACM Sigact News* 15: 78–88.
- Mermin N (1990) Quantum mysteries revisited. *American Journal of Physics* 58: 731–734.
- Mermin N (1990) Extreme quantum entanglement in a superposition of macroscopically distinct states. *Physical Review Letters* 65: 1838–1840.
- Benjamin S, Hayden P (2001) Multiplayer quantum games. *Physical Review A* 64: 030301.
- Du J, Xu X, Li H, Zhou X, Han R (2001) Entanglement playing a dominating role in quantum games. *Physics Letters A* 289: 9–15.
- Du J, Li H, Xu X, Zhou X, Han R (2003) Phase-transition-like behaviour of quantum games. *Journal of Physics A: Mathematical and General* 36: 6551.
- Han Y, Zhang Y, Guo G (2002) W state and Greenberger-Horne-Zeilinger state in quantum three-person prisoner's dilemma. *Physics Letters A* 295: 61–64.
- Flitney A, Abbott D (2005) Quantum games with decoherence. *Journal of Physics A: Mathematical and General* 38: 449.
- Ramzan M, Nawaz A, Toor A, Khan M (2008) The effect of quantum memory on quantum games. *Journal of Physics A: Mathematical and Theoretical* 41: 055307.
- Iqbal A, Toor A (2002) Quantum cooperative games. *Physics Letters A* 293: 103–108.
- Flitney A, Greentree A (2007) Coalitions in the quantum minority game: classical cheats and quantum bullies. *Physics Letters A* 362: 132–137.
- Iqbal A, Weigert S (2004) Quantum correlation games. *Journal of Physics A: Mathematical and General* 37: 5873.
- Iqbal A (2005) Playing games with EPR-type experiments. *Journal of Physics A: Mathematical and General* 38: 9551.
- Iqbal A, Cheon T (2007) Constructing quantum games from nonfactorizable joint probabilities. *Physical Review E* 76: 061122.
- Iqbal A, Cheon T, Abbott D (2008) Probabilistic analysis of three-player symmetric quantum games played using the Einstein-Podolsky-Rosen-Bohm setting. *Physics Letters A* 372: 6564–6577.
- Einstein A, Podolsky B, Rosen N (1935) Can quantum-mechanical description of physical reality be considered complete? *Physical review* 47: 777.
- Bohm D (1951) Quantum theory Dover Publications.
- Bell J (1964) On the Einstein-Podolsky-Rosen paradox. *Physics* 1: 195–200.
- Bell J (1987) Speakable and Unspeakable in Quantum Mechanics Cambridge University Press.
- Bell J (1966) On the problem of hidden variables in quantum mechanics. *Reviews of Modern Physics* 38: 447–452.
- Aspect A, Dalibard J, Roger G (1982) Experimental test of Bell's inequalities using time-varying analyzers. *Physical Review Letters* 49: 1804–1807.
- Clauser J, Shimony A (1978) Bell's theorem. experimental tests and implications. *Reports on Progress in Physics* 41: 1881.
- Cereceda J (2000) Quantum mechanical probabilities and general probabilistic constraints for Einstein-Podolsky-Rosen-Bohm experiments. *Foundations of Physics Letters* 13: 427–442.
- van Enk SJ, Pike R (2002) Classical rules and quantum games. *Phys Rev A* 66: 024306.
- Nielsen M, Chuang I (2002) Quantum Computation and Quantum Information. Cambridge, UK: Addison-Wesley, first edition.
- Hestenes D, Sobczyk G (1984) Clifford Algebra to Geometric Calculus: A unified language for mathematics and physics, volume 5 Springer.
- Hestenes D (1999) New foundations for classical mechanics: Fundamental Theories of Physics Kluwer Academic Pub.
- Doran C, Lasenby A (2003) Geometric algebra for physicists Cambridge University Press.
- De Sabbata V, Datta B (2007) Geometric algebra and applications to physics Taylor & Francis Group.
- Dorst L, Doran C, Lasenby J (2002) Applications of geometric algebra in computer science and engineering. Boston: Birkhauser.
- Chappell J, Iqbal A, Loh M, Von Smekal L (2009) An analysis of the quantum penny flip game using geometric algebra. *Journal of the Physical Society of Japan* 78: 4801.
- Chappell J, Iqbal A, Abbott D (2010) Analysis of two-player quantum games using geometric algebra. Arxiv preprint arXiv: 10071332.
- Boudet R (2008) Relativistic Transitions in the Hydrogenic atoms: Elementary Theory, volume 52 Springer Verlag.
- Hestenes D (1986) Clifford Algebras and their Applications in Mathematical Physics. Dordrecht/Boston: Reidel, chapter Clifford Algebra and the interpretation of quantum mechanics.
- Schmeikal B (2005) Algebra of matter. *Advances in Applied Clifford Algebras* 15: 271–290.
- Horn ME (2006) Tagungs-CD des Fachverbandes Didaktik der Physik der DPG in Kassel, Berlin: Lehmanns Media, chapter Quaternions and Geometric Algebra (Quaternionen und Geometrische Algebra). Arxiv: 0709.2238.
- Christian J (2007) Disproof of Bell's theorem by Clifford algebra valued local variables. Arxiv preprint quant-ph/0703179.
- Christian J (2011) Restoring local causality and objective reality to the entangled photons. Arxiv preprint arXiv: 11060748.
- Ichikawa T, Tsutsui I (2007) Duality, phase structures, and dilemmas in symmetric quantum games. *Annals of Physics* 322: 531–551.
- Marinatto L, Weber T (2000) A quantum approach to games of static information. *Phys Lett A* 272: 291–303.
- Dür W, Vidal G, Cirac J (2000) Three qubits can be entangled in two inequivalent ways. *Physical Review A* 62: 062314.
- Acin A, Andrianov A, Costa L, Jane E, Latorre J, et al. (2000) Generalized Schmidt decomposition and classification of three-qubit states. *Physical Review Letters* 85: 1560–1563.
- Pitowsky I (1982) Resolution of the Einstein-Podolsky-Rosen and Bell paradoxes. *Physical Review Letters* 48: 1299–1302.
- Pitowsky I (1983) Deterministic model of spin and statistics. *Physical Review D* 27: 2316.
- Rastall P (1983) The Bell inequalities. *Foundations of Physics* 13: 555–570.
- De Baere W, Mann A, Revzen M (1999) Locality and Bell's theorem. *Foundations of physics* 29: 67–77.
- Khrennikov A (2008) Bell-Boole inequality: nonlocality or probabilistic incompatibility of random variables? *Entropy* 10: 19–32.
- Iqbal A, Abbott D (2010) Constructing quantum games from a system of Bell's inequalities. *Physics Letters A* 374: 3155–3163.
- Cheon T (2006) Quantum computing: Back action. *AIP Conf Proc* 864: 254–260.
- Cleve R, Hoyer P, Toner B, Watrous J (2004) Consequences and limits of nonlocal strategies. In: Proceedings of the 19th IEEE Annual Conference on Computational Complexity IEEE Computer Society. pp 236–249.
- Lee C, Johnson N (2003) Game-theoretic discussion of quantum state estimation and cloning. *Physics Letters A* 319: 429–433.
- Pirandola S (2005) A quantum teleportation game. *International Journal of Quantum Information* 3: 239–243.
- Houshmand M, Houshmand M, Mashhadi H (2010) Game theory based view to the quantum key distribution BB84 protocol. In: Third International Symposium on Intelligent Information Technology and Security Informatics IEEE. pp 332–336.
